# Supplementary material for: Ultrafast carrier and coherent phonon dynamics in van der Waals ferromagnet CrI3
Source: Royal Society of Chemistry journal article supplement (doi:10.1039/d4tc04010d), 2025-01-01
Supplement: d4tc04010d1.pdf [file d4tc04010d1.pdf]

*Electronic supplementary information for*

**Ultrafast carrier and coherent phonon dynamics in van der Waals  
ferromagnet CrI<sub>3</sub>**

Chunyang Gou, Junyuan Zhang, and Yang Mi,\* S. N. Luo

Key Laboratory of Advanced Technologies of Materials, Ministry of Education, School  
of Materials Science and Engineering, and Dynamic Materials Data Science Center,  
Southwest Jiaotong University, Chengdu, Sichuan 610031, P.R. China

\*E-mail: miyang@swjtu.edu.cn

## ***Contents***

- (1) **Fig. S1** Representative  $\Delta R(t)/R_0$  signals of  $\text{CrI}_3$  collected at 10-300 K.
- (2) **Fig. S2** Temperature dependence of fit parameters of the two  $A_{1g}$  phonon modes.
- (3) **Table S1** Fit parameters for the  $A_{1g}^1$  phonon mode softening in Fig. 4(a) with the anharmonicity model.

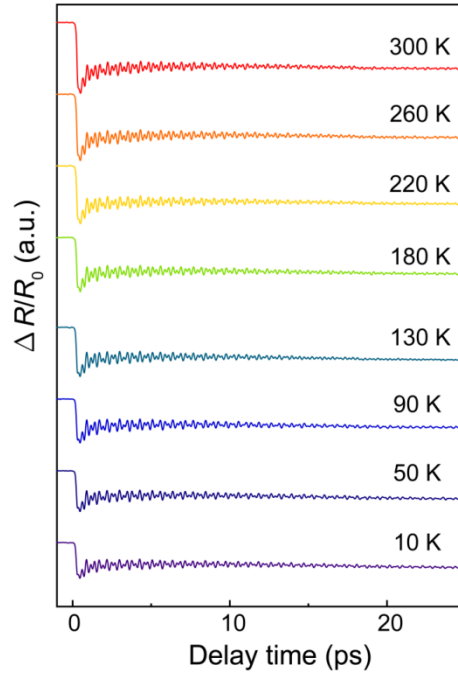

**FIG. S1.** Representative  $\Delta R(t)/R_0$  signals of  $\text{CrI}_3$  collected at 10-300 K. The  $\Delta R(t)/R_0$  traces are shifted along the vertical axis for clarity.

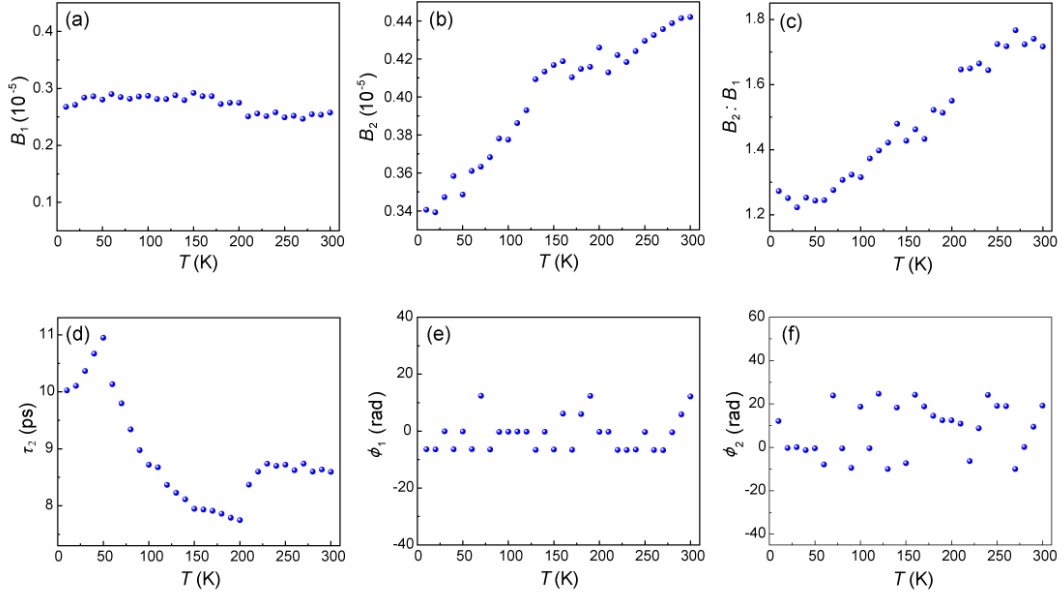

**FIG. S2.** Temperature dependence of amplitudes, (a)  $B_1$  and (b)  $B_2$ , of the two  $A_{1g}$  phonon modes. (c) The ratios ( $B_2/B_1$ ) as a function of temperature. (d) Dephasing time  $\tau_2$  of the  $A_{1g}^2$  phonon mode as a function of temperature. Temperature dependence of initial phases, (e)  $\phi_1$  and (f)  $\phi_2$ , of the two  $A_{1g}$  phonon modes.

For the oscillatory part of  $\Delta R(t)/R_0$  signals, the fitting with Eq. 1 also yields the amplitudes ( $B_1$ ,  $B_2$ ), dephasing time ( $\tau_2$ ), and initial phases ( $\phi_1$ ,  $\phi_2$ ) of the two  $A_{1g}$  phonon modes, as shown in **Fig. S2**. Generally, the amplitude of coherent phonons decreases with increasing temperature.[1-3] However, our data show abnormal results, although the experiments have been repeated several times. As shown in **Figs. S1(a) and 1(b)**,  $B_1$  is nearly temperature independent, while  $B_2$  increases with increasing temperature. This result is consistent with the reported data under left circularly polarized ( $\sigma_-$ ) pumping in a recent ultrafast study.[4] In their study, the amplitude of  $A_{1g}^1$  coherent phonons is almost the same at 15 and 75 K, while the amplitude of  $A_{1g}^2$  coherent phonons is much larger at 75 K than that at 15 K. The underlying reason is not known yet. **Fig. S1(d)** shows the temperature dependence of dephasing time  $\tau_2$ , which is similar to that of  $\tau$  in Fig. 5. However, the fitting to temperature dependence of dephasing rate ( $\tau_2^{-1}$ ) with the anharmonic phonon model is not satisfactory at 60–200 K. The dynamics of the  $A_{1g}^2$  phonons is beyond our research interest.

| Parameter                     | Value                  |
|-------------------------------|------------------------|
| $\omega_0$ (rad/s)            | $14.97 \times 10^{12}$ |
| $D$ (rad/s)                   | $-3 \times 10^{12}$    |
| $\alpha_a$ (K <sup>-1</sup> ) | $2 \times 10^{-6}$     |
| $\alpha_b$ (K <sup>-1</sup> ) | $2 \times 10^{-6}$     |
| $\alpha_c$ (K <sup>-1</sup> ) | $2 \times 10^{-5}$     |
| $\gamma'$                     | 1.5                    |

**Table S1.** Fit parameters for the  $A_{1g}^1$  phonon mode softening in Fig. 4(a) with the anharmonicity model [Eqs (6)-(8)]. The values of linear thermal expansion coefficients ( $\alpha_a$ ,  $\alpha_b$  and  $\alpha_c$ ) are available for CrI<sub>3</sub> from previous reports.[5]

## References

- [1] J. Guo, W. Liang, and S. N. Luo, *J. Phys. Chem. Lett.*, 2020, **11**, 9351-9357.
- [2] F. Mertens, D. Mönkebüscher, U. Parlak, C. Boix-Constant, S. Mañas-Valero, M. Matzer, and M. Cinchetti, *Adv. Mater.*, 2023, **35**, 2208355.
- [3] L. L. Hu, M. Yang, Y. L. Wu, Q. Wu, H. Zhao, F. Sun, and J. Zhao, *Phys. Rev. B*, 2019, **99**, 094307.
- [4] P. Padmanabhan, F. L. Buessen, R. Tutchton, K. W. C. Kwock, S. Gilinsky, M. C. Lee, and R. P. Prasankumar, *Nat. Commun.*, 2022, 13, 4473.
- [5] J. Arneth, M. Jonak, S. Spachmann, M. Abdel-Hafiez, Y. Kvashnin, R. Klingeler, *Phys. Rev. B*, 2022, **105**, L060404.
